# Supplementary material for: Comparison of PB1-F2 Proximity Interactomes Reveals Functional Differences between a Human and an Avian Influenza Virus
Source: MDPI journal article supplement (doi:10.3390/v15020328), 2023-01-24
Supplement: s1 [file s1]

Table S1 - Mettier *et al.*

| Protein ID | Gene Symbol | H7N1 | H3N2 | Gene Name                                                                  | Protein class                                       |
|------------|-------------|------|------|----------------------------------------------------------------------------|-----------------------------------------------------|
| P55011     | SLC12A2     | X    | X    | Solute carrier family 12 member 2                                          | secondary carrier transporter                       |
| Q9NZI8     | IGF2BP1     | X    | X    | Insulin-like growth factor 2 mRNA-binding protein 1                        | RNA metabolism protein                              |
| P05165     | PCCA        | X    | X    | Propionyl-CoA carboxylase alpha chain, mitochondrial                       | ligase                                              |
| Q15020     | SART3       | X    | X    | Squamous cell carcinoma antigen recognized by T-cells 3                    | RNA splicing factor                                 |
| Q13442     | PDP1        | X    | X    | 28 kDa heat- and acid-stable phosphoprotein                                | -                                                   |
| P20020     | ATP2B1      | X    | X    | Plasma membrane calcium-transporting ATPase 1                              | primary active transporter                          |
| P02786     | TFRC        | X    | X    | Transferrin receptor protein 1                                             | metalloprotease                                     |
| P08195     | SLC3A2      | X    | X    | 4F2 cell-surface antigen heavy chain                                       | -                                                   |
| P00533     | EGFR        | X    | X    | Epidermal growth factor receptor                                           | transmembrane signal receptor                       |
| Q8WYP5     | AHCTF1      | X    | X    | Protein ELYS                                                               | scaffold/adaptor protein                            |
| O00541     | PES1        | X    |      | Pescadillo homolog                                                         | RNA metabolism protein                              |
| Q86UE4     | MTDH        | X    |      | Protein LYRIC                                                              | -                                                   |
| Q01082     | SPTBN1      | X    |      | Spectrin beta chain, non-erythrocytic 1                                    | actin or actin-binding cytoskeletal protein         |
| P61604     | HSPE1       | X    |      | 10 kDa heat shock protein, mitochondrial                                   | chaperonin                                          |
| Q9UIQ6     | LNPEP       | X    |      | Leucyl-cystinyl aminopeptidase                                             | metalloprotease                                     |
| Q9BTC8     | MTA3        | X    |      | Metastasis-associated protein MTA3                                         | homeodomain transcription factor                    |
| Q6P1J9     | CDC73       | X    |      | Parafibromin                                                               | -                                                   |
| O94776     | MTA2        | X    |      | Metastasis-associated protein MTA2                                         | homeodomain transcription factor                    |
| Q96I25     | RBM17       | X    |      | Splicing factor 45                                                         | RNA splicing factor                                 |
| Q99613     | EIF3C       | X    |      | Eukaryotic translation initiation factor 3 subunit C                       | translation initiation factor                       |
| Q86VM9     | ZC3H18      | X    |      | Zinc finger CCCH domain-containing protein 18                              | -                                                   |
| Q641Q2     | WASHC2A     | X    |      | WASH complex subunit 2A                                                    | scaffold/adaptor protein                            |
| O95400     | CD2BP2      | X    |      | CD2 antigen cytoplasmic tail-binding protein 2                             | RNA splicing factor                                 |
| Q9UJU6     | DBNL        | X    |      | Drebrin-like protein                                                       | scaffold/adaptor protein                            |
| Q92692     | NECTIN2     | X    |      | Nectin-2                                                                   | -                                                   |
| Q6NZI2     | CAVIN1      | X    |      | Caveolae-associated protein 1                                              | membrane traffic protein                            |
| Q96TA1     | FAM129B     | X    |      | Protein Niban 2                                                            | -                                                   |
| Q99733     | NAP1L4      | X    |      | Nucleosome assembly protein 1-like 4                                       | chromatin/chromatin-binding, or -regulatory protein |
| P51116     | FXR2        | X    |      | Fragile X mental retardation syndrome-related protein 2                    | translation factor                                  |
| Q7Z478     | DHX29       | X    |      | ATP-dependent RNA helicase DHX29                                           | RNA helicase                                        |
| P55265     | ADAR        | X    |      | Double-stranded RNA-specific adenosine deaminase                           | RNA metabolism protein                              |
| P61011     | SRP54       | X    |      | Signal recognition particle 54 kDa protein                                 | RNA metabolism protein                              |
| Q05682     | CALD1       | X    |      | Caldesmon                                                                  | non-motor actin binding protein                     |
| Q92598     | HSPH1       | X    |      | Heat shock protein 105 kDa                                                 | Hsp70 family chaperone                              |
| B5ME19     | EIF3CL      | X    |      | Eukaryotic translation initiation factor 3 subunit C-like protein          | translation initiation factor                       |
| Q13330     | MTA1        | X    |      | Metastasis-associated protein MTA1                                         | homeodomain transcription factor                    |
| Q9Y4E1     | WASHC2C     | X    |      | WASH complex subunit 2C                                                    | scaffold/adaptor protein                            |
| Q9H624     | RANBP3      | X    |      | Ran-binding protein 3                                                      | scaffold/adaptor protein                            |
| Q96RT1     | ERBIN       | X    |      | Erbin                                                                      | scaffold/adaptor protein                            |
| P20810     | CAST        | X    |      | Calpastatin                                                                | protease inhibitor                                  |
| Q9H0U4     | RAB1B       | X    |      | Ras-related protein Rab-1B                                                 | small GTPase                                        |
| Q96AE4     | FUBP1       | X    |      | Far upstream element-binding protein 1                                     | RNA metabolism protein                              |
| Q13435     | SF3B2       | X    |      | Splicing factor 3B subunit 2                                               | RNA splicing factor                                 |
| Q04637     | EIF4G1      | X    |      | Eukaryotic translation initiation factor 4 gamma 1                         | translation initiation factor                       |
| P13861     | PRKAR2A     | X    |      | cAMP-dependent protein kinase type II-alpha regulatory subunit             | kinase modulator                                    |
| Q9NYB9     | ABI2        | X    |      | Abl interactor 2                                                           | scaffold/adaptor protein                            |
| Q9BY77     | POLDIP3     | X    |      | Polymerase delta-interacting protein 3                                     | RNA metabolism protein                              |
| Q14978     | NOLC1       | X    |      | Nucleolar and coiled-body phosphoprotein 1                                 | -                                                   |
| Q99426     | TBCB        | X    |      | Tubulin-folding cofactor B                                                 | chaperone                                           |
| Q8TEQ6     | GEMIN5      | X    |      | Gem-associated protein 5                                                   | -                                                   |
| P00450     | CP          |      | X    | Ceruloplasmin                                                              | oxidase                                             |
| Q13813     | SPTAN1      | X    |      | Spectrin alpha chain, non-erythrocytic 1                                   | actin or actin-binding cytoskeletal protein         |
| Q02952     | AKAP12      | X    |      | A-kinase anchor protein 12                                                 | scaffold/adaptor protein                            |
| P35658     | NUP214      | X    |      | Nuclear pore complex protein Nup214                                        | transporter                                         |
| Q9NUL3     | STAU2       | X    |      | Double-stranded RNA-binding protein Staufen homolog 2                      | -                                                   |
| P29317     | EPHA2       | X    |      | Ephrin type-A receptor 2                                                   | transmembrane signal receptor                       |
| Q04917     | YWHAH       | X    |      | 14-3-3 protein eta                                                         | scaffold/adaptor protein                            |
| P49792     | RANBP2      | X    |      | E3 SUMO-protein ligase RanBP2                                              | scaffold/adaptor protein                            |
| Q15637     | SF1         | X    |      | Splicing factor 1                                                          | RNA splicing factor                                 |
| Q12913     | PTPRJ       | X    |      | Receptor-type tyrosine-protein phosphatase eta                             | protein phosphatase                                 |
| E9PAV3     | NACA        | X    |      | Nascent polypeptide-associated complex subunit alpha, muscle-specific form | basic helix-loop-helix transcription factor         |
| P61981     | YWHAG       | X    |      | 14-3-3 protein gamma                                                       | scaffold/adaptor protein                            |
| O43396     | TXNL1       | X    |      | Thioredoxin-like protein 1                                                 | oxidoreductase                                      |
| Q9UPN7     | PPP6R1      | X    |      | Serine/threonine-protein phosphatase 6 regulatory subunit 1                | phosphatase modulator                               |
| Q96RQ3     | MCCC1       | X    |      | Methylcrotonoyl-CoA carboxylase subunit alpha, mitochondrial               | ligase                                              |
| Q9NZM1     | MYOF        | X    |      | Myoferlin                                                                  | -                                                   |
| P81605     | DCD         | X    |      | Dermcidin                                                                  | -                                                   |
| Q13596     | SNX1        | X    |      | Sorting nexin-1                                                            | scaffold/adaptor protein                            |
| P46060     | RANGAP1     | X    |      | Ran GTPase-activating protein 1                                            | GTPase-activating protein                           |
| Q14966     | ZNF638      | X    |      | Zinc finger protein 638                                                    | RNA processing factor                               |
| P31947     | SFN         | X    |      | 14-3-3 protein sigma                                                       | scaffold/adaptor protein                            |
| P02545     | LMNA        | X    |      | Prelamin-A/C                                                               | -                                                   |
| Q5VZ89     | DENND4C     | X    |      | DENN domain-containing protein 4C                                          | guanyl-nucleotide exchange factor                   |
| P62820     | RAB1A       | X    |      | Ras-related protein Rab-1A                                                 | small GTPase                                        |
| Q9Y5Y0     | FLVCR1      | X    |      | Feline leukemia virus subgroup C receptor-related protein 1                | secondary carrier transporter                       |
| P20930     | FLG         | X    |      | Filaggrin                                                                  | cytoskeletal protein                                |
| P05556     | ITGB1       | X    |      | Integrin beta-1                                                            | integrin                                            |
| P02788     | LTF         | X    |      | Lactotransferrin                                                           | transfer/carrier protein                            |
| Q9P2E9     | RRBP1       | X    |      | Ribosome-binding protein 1                                                 | scaffold/adaptor protein                            |
| P29966     | MARCKS      | X    |      | Myristoylated alanine-rich C-kinase substrate                              | -                                                   |
| P55327     | TPD52       | X    |      | Tumor protein D52                                                          | -                                                   |
| P01040     | CSTA        | X    |      | Cystatin-A                                                                 | protease inhibitor                                  |
| P14923     | JUP         | X    |      | Junction plakoglobin                                                       | -                                                   |
| P15924     | DSP         | X    |      | Desmoplakin                                                                | intermediate filament binding protein               |
| O00763     | ACACB       | X    |      | Acetyl-CoA carboxylase 2                                                   | -                                                   |

Figure S1 - Mettier *et al.*

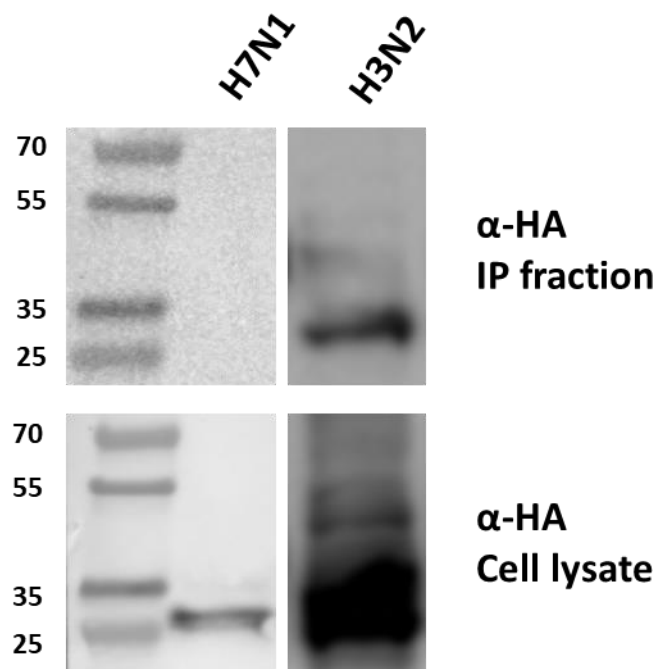

**Figure S1 :** Western blot analysis of the PB1-F2 – 14-3-3 protein interaction after immunoprecipitation assay. Cells were transiently transfected with constructs allowing the expression of HA-tagged YWHAH protein together with PB1-F2. Immunoprecipitations (IP) were performed with an anti-PB1-F2 antibody.
